# Supplementary material
Source: Springer Nature journal article supplement (https://www.springermedizin.de/resource/supplementary/12906_2010_470_MOESM6_ESM.pdf/9519566)

## Effect of Plumbagin on the production of IFN- $\gamma$ in collagen Type II induced arthritis mice

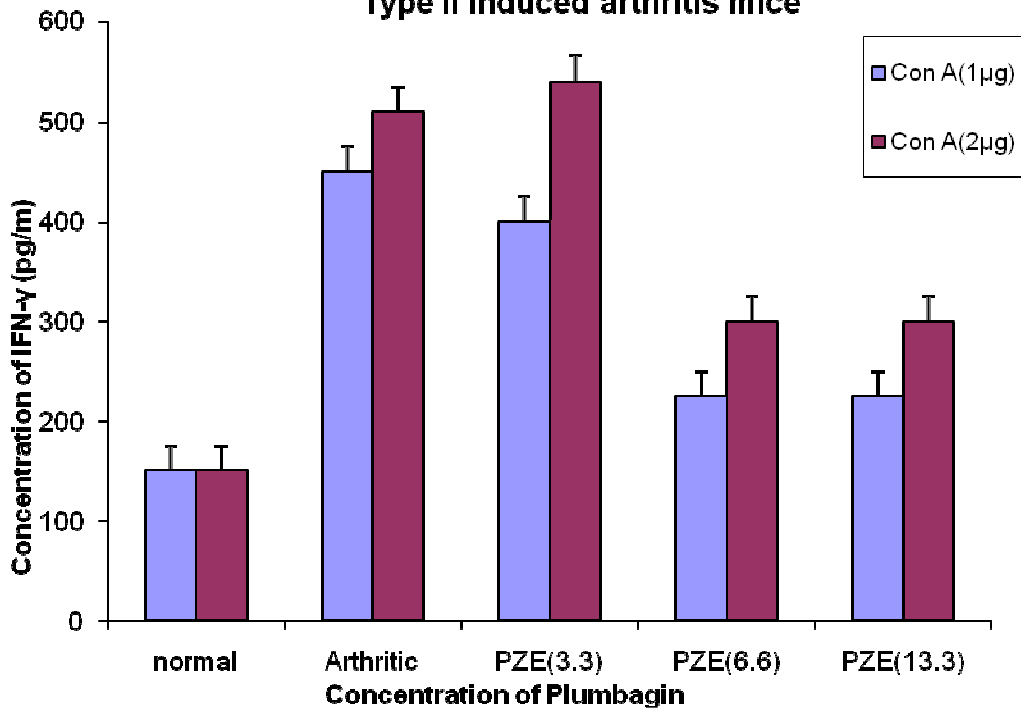

Supplement: MOESM6 [file 9519566]
